# Supplementary material for: Structure and magnetic properties of an amine-templated one-dimensional cobalt-fluoro-sulfate containing Co4F4 cubane and hydrogen evolution reaction (HER) performance of its derived carbon-wrapped CoSe2 nanorods
Source: Royal Society of Chemistry journal article supplement (doi:10.1039/d3dt01789c), 2023-01-01
Supplement: d3dt01789c1.pdf [file d3dt01789c1.pdf]

## Supporting Information

### **Structure and magnetic properties of an amine-templated one-dimensional cobalt-fluoro-sulfate containing Co<sub>4</sub>F<sub>4</sub> Cubane & hydrogen evolution reaction (HER) performance of its derived carbon-wrapped CoSe<sub>2</sub> nanorods**

Malaya K. Sahoo<sup>ab</sup>, J. N. Behera<sup>ab\*</sup>

<sup>a</sup> School of Chemical Science, National Institute of Science Education and Research (NISER) an OCC of Homi Bhabha National Institute (HBNI), Khurda, 752050, Odisha, India.

<sup>b</sup> Centre for Interdisciplinary Sciences (CIS), NISER, Khurda, 752050, Odisha, India.

E-mail: [jnbehera@niser.ac.in](mailto:jnbehera@niser.ac.in)

#### **Electrochemical Calculations:**

All electrochemical data are collected taking Ag/AgCl reference electrode and later converted to a reversible hydrogen electrode (RHE) scale by the following equation for comparative analysis and presentation.

$$E_{RHE} = E^{\circ}_{Ag/AgCl} + 0.059 \times pH + E_{Ag/AgCl}$$

Again, the intrinsic activity of the catalysts is compared by compensating the ohmic drop ( $iR$ ) that suppresses the real activity of the catalyst due to the unavoidable series resistance of the solution and electrical contact using the following equation.<sup>1</sup>

$$E_{iR} = E - iR$$

**Specific activity:** The specific activity is the activity per unit electrochemically accessible surface area of the catalyst. It is the plot of the current density vs working electrode potential in the RHE scale. Here the current density is obtained by normalizing the experimental LSV current to the electrochemically accessible surface.

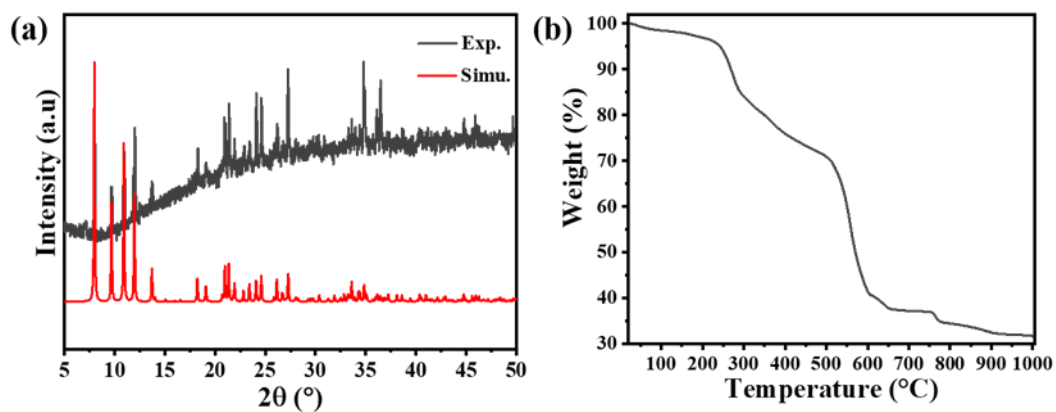

**Figure S1.** (a) Simulated and experimental powder pattern and (b) TGA spectrum of the Cubane chain.

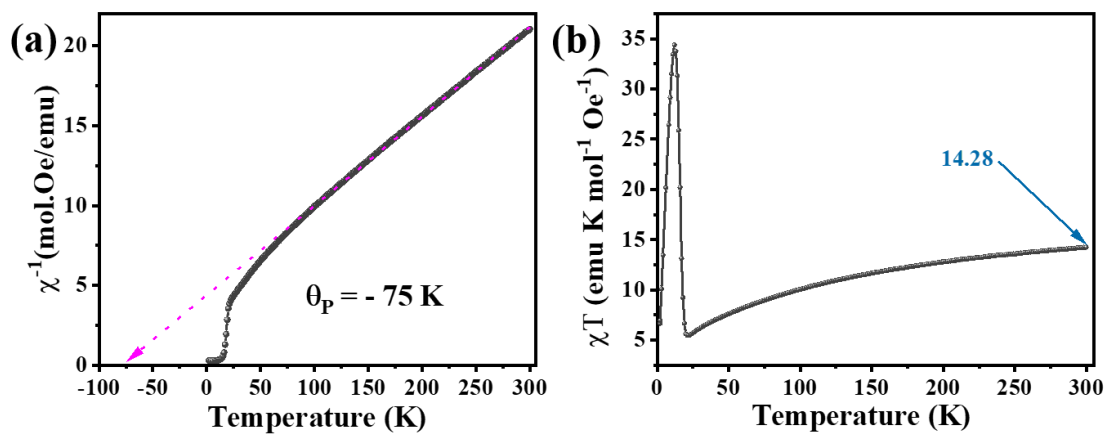

**Figure S2.** (a) Curie-Weiss fitting of the reciprocal susceptibility, (b) variation of observed magnetic moment with temperature for the Cubane chain.

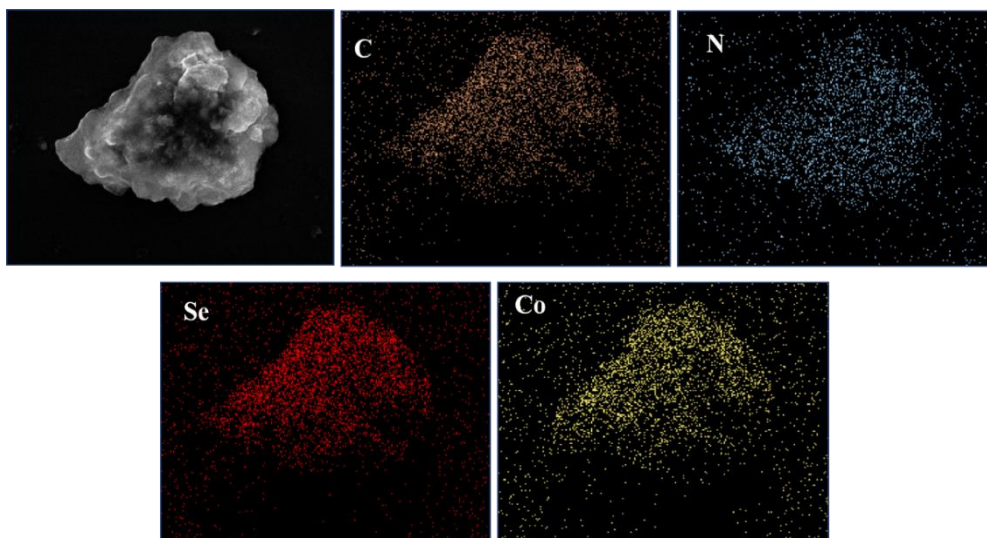

**Figure S3.** EDAX elemental mapping of CoSe<sub>2</sub>@ST shows the uniform distribution of Co, Se, and the rich nitrogen and carbonaceous matrix.

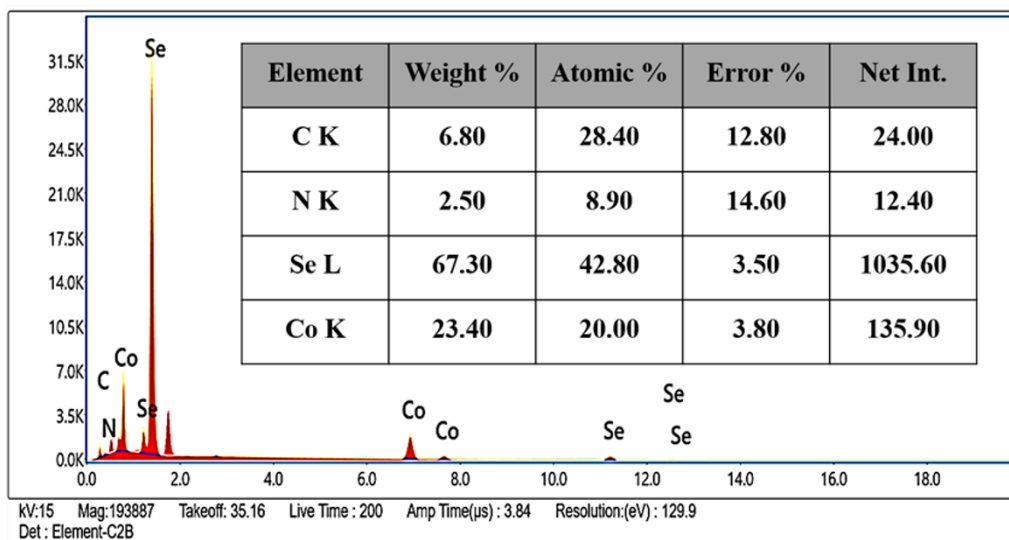

**Figure S4.** EDS spectrum and elemental table with the elemental percentage in CoSe<sub>2</sub>@ST.

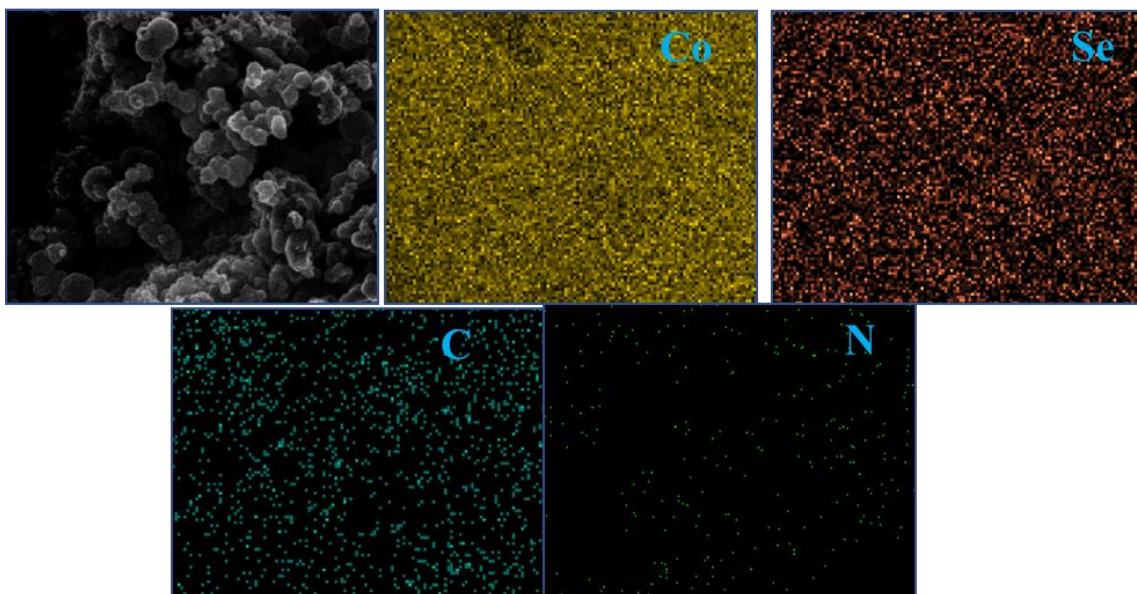

**Figure S5.** EDAX elemental mapping of CoSe<sub>2</sub>@HT shows the uniform distribution of Co, Se, and the presence of a very minute quantity of nitrogen and carbon.

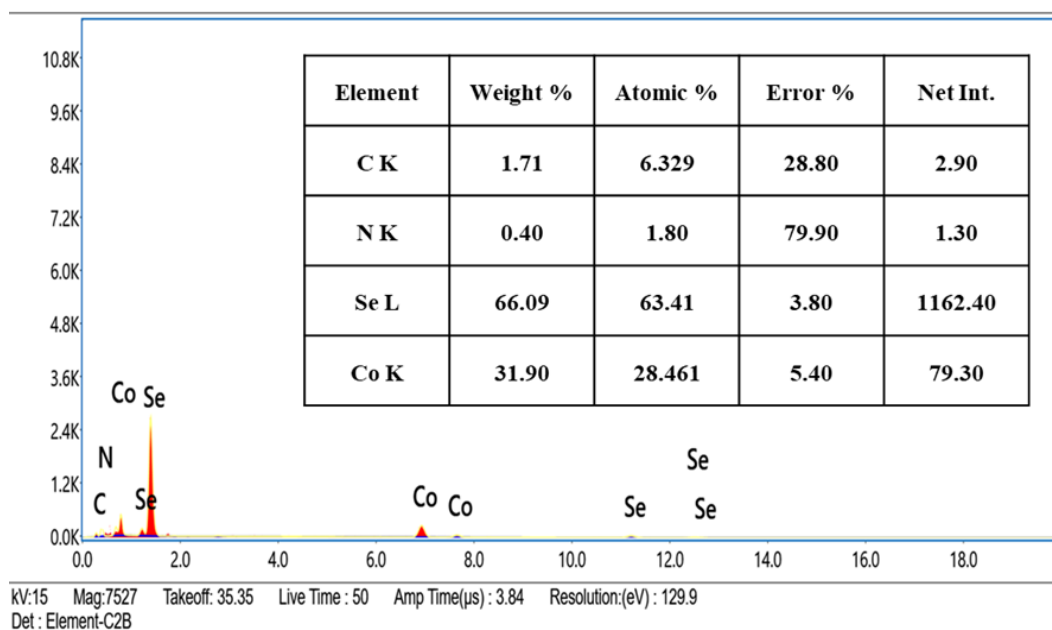

**Figure S6.** EDS spectrum and elemental table with the elemental percentage in CoSe<sub>2</sub>@HT.

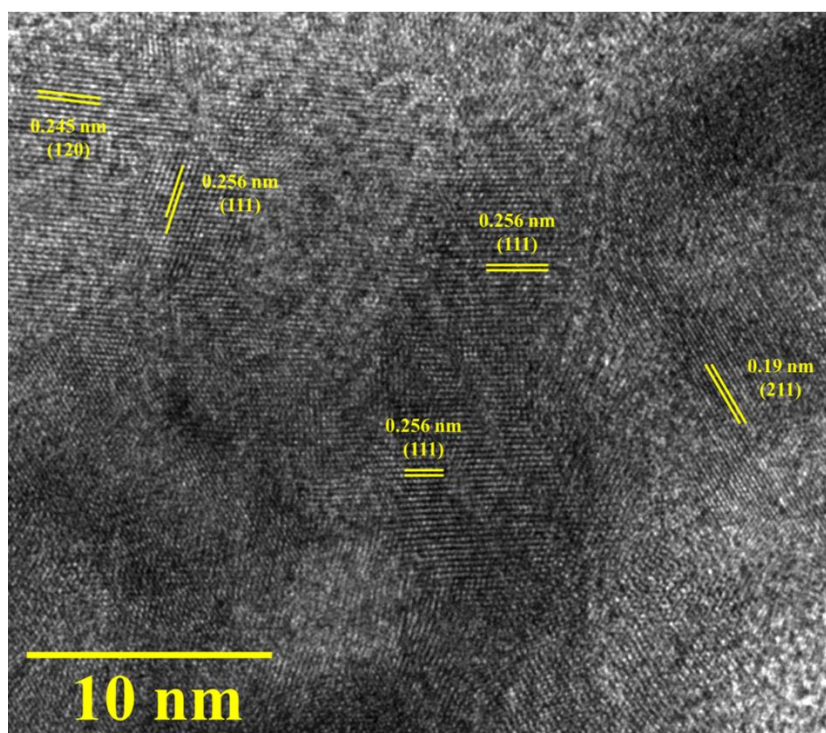

**Figure S7.** HR-TEM showing the lattice fringes of CoSe<sub>2</sub> in CoSe<sub>2</sub>@ST.

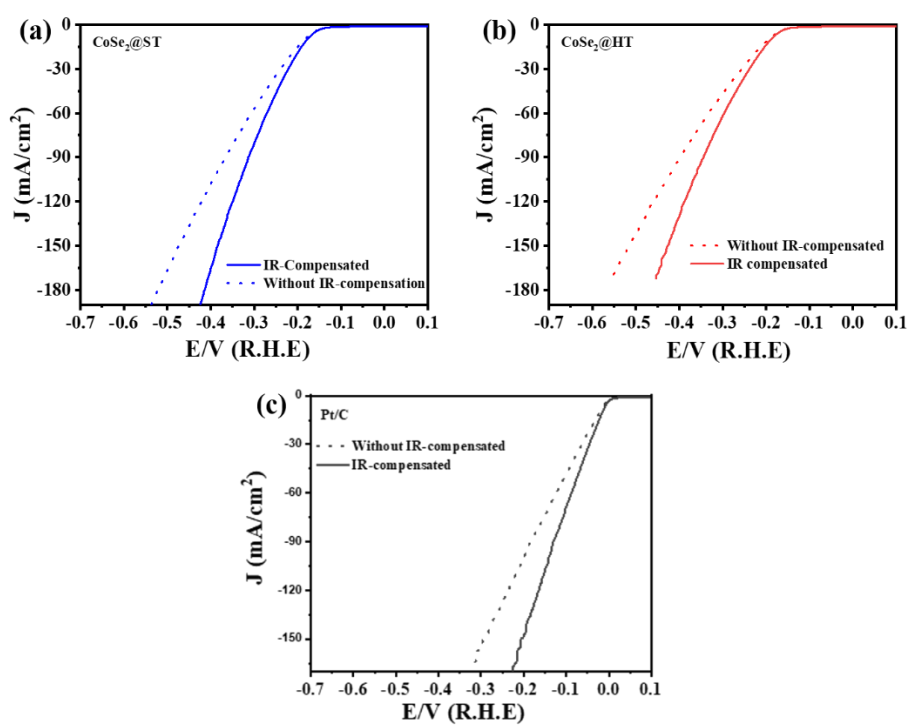

**Figure S8.** Ohmic drop (iR) uncompensated LSVs of all the catalysts.

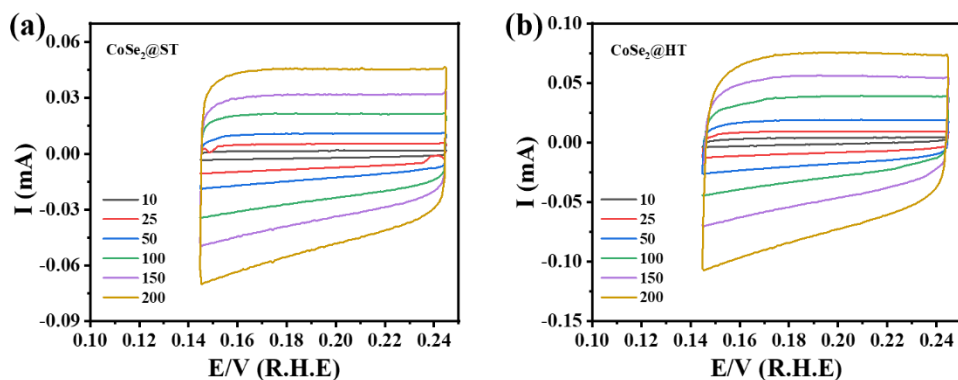

**Figure S9.** Cyclic voltammograms at different scan rates in the EDLC region.

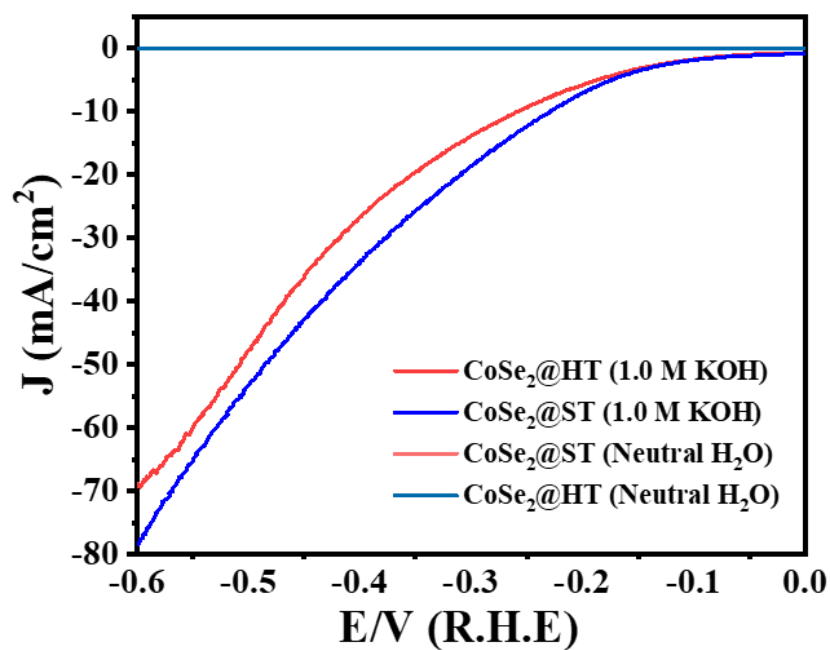

**Figure S10.** Linear-sweep voltammograms of the catalysts in 1.0 M KOH and neutral water.

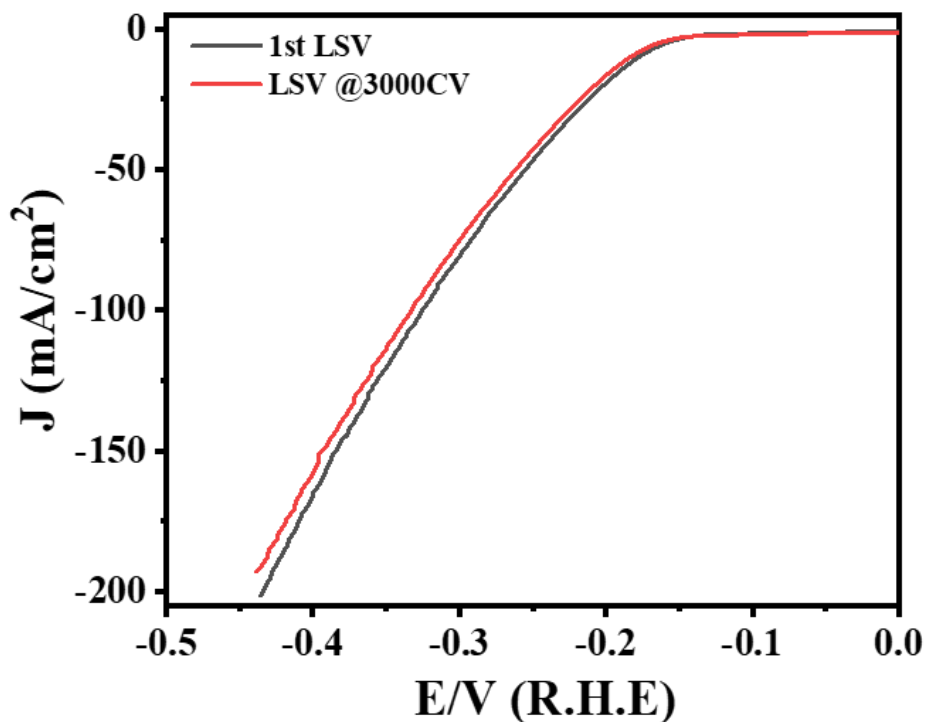

**Figure S11.** Linear-sweep voltammograms of the CoSe<sub>2</sub>@ST before and after 3000 continuous CV cycles.

**Table S1.** Selected bond lengths for the 1D Cubane chain.

| Atom | Atom            | Length/Å  | Atom | Atom             | Length/Å  |
|------|-----------------|-----------|------|------------------|-----------|
| Co2  | F2              | 2.092(7)  | Co1  | O1               | 2.039(10) |
| Co2  | F2 <sup>1</sup> | 2.105(8)  | Co1  | N1               | 2.042(11) |
| Co2  | F1              | 2.097(8)  | F2   | Co2 <sup>1</sup> | 2.105(8)  |
| Co2  | O5              | 2.096(9)  | F1   | Co1 <sup>1</sup> | 2.077(9)  |
| Co2  | O2              | 2.078(10) | Co1  | F1 <sup>1</sup>  | 2.077(9)  |
| Co2  | N3              | 2.045(11) | Co1  | O6               | 2.079(9)  |
| Co1  | F2              | 2.117(8)  | Co1  | O1               | 2.039(10) |
| Co1  | F1              | 2.113(8)  | Co1  | N1               | 2.042(11) |

**Table S2.** The selected bond angle of the 1D Cubane chain.

| Atom | Atom | Atom            | Angle/°  | Atom             | Atom | Atom             | Angle/°  |
|------|------|-----------------|----------|------------------|------|------------------|----------|
| F2   | Co2  | F2 <sup>1</sup> | 81.8(3)  | N3               | Co2  | O2               | 95.4(4)  |
| F2   | Co2  | F1              | 82.3(3)  | F1 <sup>1</sup>  | Co1  | F2               | 77.3(3)  |
| F2   | Co2  | O5              | 87.9(3)  | F1               | Co1  | F2               | 81.3(3)  |
| F1   | Co2  | F2 <sup>1</sup> | 77.1(3)  | F1 <sup>1</sup>  | Co1  | F1               | 80.7(4)  |
| O5   | Co2  | F2 <sup>1</sup> | 88.4(3)  | F1 <sup>1</sup>  | Co1  | O6               | 86.8(4)  |
| O5   | Co2  | F1              | 163.5(3) | O6               | Co1  | F2               | 163.0(3) |
| O2   | Co2  | F2              | 86.3(4)  | O6               | Co1  | F1               | 90.4(4)  |
| O2   | Co2  | F2 <sup>1</sup> | 164.3(3) | O1               | Co1  | F2               | 93.5(4)  |
| O2   | Co2  | F1              | 91.3(4)  | Co2              | F2   | Co2 <sup>1</sup> | 97.1(3)  |
| O2   | Co2  | O5              | 101.3(4) | Co2 <sup>1</sup> | F2   | Co1              | 101.9(3) |
| N3   | Co2  | F2 <sup>1</sup> | 96.8(4)  | Co2              | F2   | Co1              | 96.7(3)  |
| N3   | Co2  | F2              | 178.0(4) | Co2              | F1   | Co1              | 96.6(3)  |
| N3   | Co2  | F1              | 98.7(4)  | Co1 <sup>1</sup> | F1   | Co2              | 103.5(4) |
| N3   | Co2  | O5              | 90.8(4)  | Co1 <sup>1</sup> | F1   | Co1              | 97.9(4)  |
| O1   | Co1  | F1 <sup>1</sup> | 163.6(4) | N1               | Co1  | F2               | 96.2(4)  |
| O1   | Co1  | F1              | 84.6(4)  | N1               | Co1  | F1 <sup>1</sup>  | 98.8(4)  |
| O1   | Co1  | O6              | 100.4(5) | N1               | Co1  | F1               | 177.5(5) |
| O1   | Co1  | N1              | 95.6(5)  | N1               | Co1  | O6               | 92.0(5)  |

**Table S3** Electrochemical HER activity comparison with previous reports.

| SL No. | Catalyst                                              | Overpotential @10 mA/cm <sup>2</sup> | Tafel Slope | Reference |
|--------|-------------------------------------------------------|--------------------------------------|-------------|-----------|
| 1      | CoSe <sub>2</sub>  CoP/CFP                            | 140                                  | 42          | 2         |
|        | CoSe <sub>2</sub> /CFP                                | 219                                  | 44          |           |
| 2      | CoSe <sub>2</sub> -CNT                                | 174                                  | 37.8        | 3         |
| 3      | Mn <sub>0.05</sub> Co <sub>0.95</sub> Se <sub>2</sub> | 174                                  | 36          | 4         |
|        | CoSe <sub>2</sub> Nanosheet                           | 250                                  | 52          |           |
| 4      | CoSe <sub>2</sub> @NC                                 | 184                                  | 58.4        | 5         |
| 5      | MOF-CoSe <sub>2</sub>                                 | 150@onset<br>330@80                  | 42          | 6         |
| 6      | CoSe <sub>2</sub>                                     | 272                                  | 55          | 7         |
| 7      | Ru-CoSe-NC                                            | 152                                  | 37          | 8         |
|        | CoSe-NC                                               | 228                                  | 46          |           |
| 8      | CoSe <sub>2</sub> @N/C-CNT                            | 185                                  | 98          | 9         |
| 9      | p-CoSe <sub>2</sub> @HC                               | 171.7                                | 45.7        | 10        |



|    |                                                       |     |      |                         |
|----|-------------------------------------------------------|-----|------|-------------------------|
| 10 | CoSe <sub>2</sub>                                     | 137 | 42.1 | 11                      |
| 11 | MoSe <sub>2</sub> /CoSe <sub>2</sub><br>hybrid        | 129 | 38.2 | 12                      |
| 12 | o-CoSe <sub>2</sub>                                   | 300 |      | 13                      |
| 13 | Ni <sub>0.33</sub> Co <sub>0.67</sub> Se <sub>2</sub> | 65  | 35   | 14                      |
| 14 | o-CoSe <sub>2</sub> -NC                               | 147 | 39.8 | 15                      |
| 15 | Cobalt selenide<br>films                              | 135 | 62   | 16                      |
| 16 | meso-CoSSe-12h                                        | 110 | 52   | 17                      |
| 17 | CoSe <sub>2</sub> /C                                  | 253 | 46   | 18                      |
| 18 | MOF-D CoSe <sub>2</sub>                               | 195 | 43   | 19                      |
| 19 | CoSe <sub>2</sub> @HT                                 | 189 | 57   | <b>Present<br/>Work</b> |
| 20 | CoSe <sub>2</sub> @ST                                 | 177 | 48   |                         |

## References

- (1) Anantharaj, S.; Noda, S. IR Drop Correction in Potentiostatic Electrocatalysis: Everything One Needs to Know! *J. Mater. Chem. A* **2022**, 9348–9354. <https://doi.org/10.1039/D2TA01393B>.
- (2) Bose, R.; Kim, T.-H.; Koh, B.; Jung, C.-Y.; Yi, S. C. Influence of Phosphidation on CoSe<sub>2</sub> Catalyst for Hydrogen Evolution Reaction. *ChemistrySelect* **2017**, 2 (33), 10661–10667. <https://doi.org/https://doi.org/10.1002/slct.201702172>.
- (3) Kim, J. K.; Park, G. D.; Kim, J. H.; Park, S.-K.; Kang, Y. C. Rational Design and Synthesis of Extremely Efficient Macroporous CoSe<sub>2</sub>-CNT Composite Microspheres for Hydrogen Evolution Reaction. *Small* **2017**, 13 (27), 1700068. <https://doi.org/https://doi.org/10.1002/sml.201700068>.
- (4) Liu, Y.; Hua, X.; Xiao, C.; Zhou, T.; Huang, P.; Guo, Z.; Pan, B.; Xie, Y. Heterogeneous Spin States in Ultrathin Nanosheets Induce Subtle Lattice Distortion To Trigger Efficient Hydrogen Evolution. *J. Am. Chem. Soc.* **2016**, 138 (15), 5087–5092. <https://doi.org/10.1021/jacs.6b00858>.
- (5) Do, H. H.; Le, Q. Van; Cho, J. H.; Ahn, S. H.; Kim, S. Y. Comparative Study on Hydrogen Evolution Reaction of Various Cobalt-Selenide-Based Electrocatalysts. *Int. J. Energy Res.* **2023**, 2023, 6016603. <https://doi.org/10.1155/2023/6016603>.

- (6) Lin, J.; He, J.; Qi, F.; Zheng, B.; Wang, X.; Yu, B.; Zhou, K.; Zhang, W.; Li, Y.; Chen, Y. In-Situ Selenization of Co-Based Metal-Organic Frameworks as a Highly Efficient Electrocatalyst for Hydrogen Evolution Reaction. *Electrochim. Acta* **2017**, *247*, 258–264. <https://doi.org/https://doi.org/10.1016/j.electacta.2017.06.179>.
- (7) McCarthy, C. L.; Downes, C. A.; Schueller, E. C.; Abuyen, K.; Brutchey, R. L. Method for the Solution Deposition of Phase-Pure CoSe<sub>2</sub> as an Efficient Hydrogen Evolution Reaction Electrocatalyst. *ACS Energy Lett.* **2016**, *1* (3), 607–611. <https://doi.org/10.1021/acseenergylett.6b00246>.
- (8) Wang, M.; Dang, Z.; Prato, M.; Petralanda, U.; Infante, I.; Shinde, D. V.; De Trizio, L.; Manna, L. Ruthenium-Decorated Cobalt Selenide Nanocrystals for Hydrogen Evolution. *ACS Appl. Nano Mater.* **2019**, *2* (9), 5695–5703. <https://doi.org/10.1021/acsanm.9b01205>.
- (9) Ding, H.; Xu, G.; Zhang, L.; Wei, B.; Hei, J.; Chen, L. A Highly Effective Bifunctional Catalyst of Cobalt Selenide Nanoparticles Embedded Nitrogen-Doped Bamboo-like Carbon Nanotubes toward Hydrogen and Oxygen Evolution Reactions Based on Metal-Organic Framework. *J. Colloid Interface Sci.* **2020**, *566*, 296–303. <https://doi.org/https://doi.org/10.1016/j.jcis.2020.01.096>.
- (10) Yang, S. H.; Park, G. D.; Kim, J. K.; Kang, Y. C. New Strategy to Synthesize Optimal Cobalt Diselenide@hollow Mesoporous Carbon Nanospheres for Highly Efficient Hydrogen Evolution Reaction. *Chem. Eng. J.* **2021**, *424*, 130341. <https://doi.org/https://doi.org/10.1016/j.cej.2021.130341>.
- (11) Kong, D.; Wang, H.; Lu, Z.; Cui, Y. CoSe<sub>2</sub> Nanoparticles Grown on Carbon Fiber Paper: An Efficient and Stable Electrocatalyst for Hydrogen Evolution Reaction. *J. Am. Chem. Soc.* **2014**, *136* (13), 4897–4900. <https://doi.org/10.1021/ja501497n>.
- (12) Wang, Y.; Jian, C.; He, X.; Liu, W. Self-Supported Molybdenum Selenide Nanosheets Grown on Urchin-like Cobalt Selenide Nanowires Array for Efficient Hydrogen Evolution. *Int. J. Hydrogen Energy* **2020**, *45* (24), 13282–13289. <https://doi.org/https://doi.org/10.1016/j.ijhydene.2020.03.017>.
- (13) Zhou, Z.; Yang, Y.; Hu, L.; Zhou, G.; Xia, Y.; Hu, Q.; Yin, W.; Zhu, X.; Yi, J.; Wang, X. Phase Control of Cobalt Selenide: Unraveling the Relationship Between Phase Property and Hydrogen Evolution Catalysis. *Adv. Mater. Interfaces* **2022**, *9* (29), 2201473. <https://doi.org/https://doi.org/10.1002/admi.202201473>.
- (14) Xia, C.; Liang, H.; Zhu, J.; Schwingenschlögl, U.; Alshareef, H. N. Active Edge Sites Engineering in Nickel Cobalt Selenide Solid Solutions for Highly Efficient Hydrogen

Evolution. *Adv. Energy Mater.* **2017**, 7 (9), 1602089.  
<https://doi.org/https://doi.org/10.1002/aenm.201602089>.

- (15) Sun, J.; Li, J.; Li, Z.; Hu, X.; Bai, H.; Meng, X. Phase Transition in Cobalt Selenide with a Greatly Improved Electrocatalytic Activity in Hydrogen Evolution Reactions. *ACS Sustain. Chem. Eng.* **2022**, 10 (12), 4022–4030. <https://doi.org/10.1021/acssuschemeng.2c00449>.
- (16) Carim, A. I.; Saadi, F. H.; Soriaga, M. P.; Lewis, N. S. Electrocatalysis of the Hydrogen-Evolution Reaction by Electrodeposited Amorphous Cobalt Selenide Films. *J. Mater. Chem. A* **2014**, 2 (34), 13835–13839. <https://doi.org/10.1039/C4TA02611J>.
- (17) Dutta, B.; Wu, Y.; Chen, J.; Wang, J.; He, J.; Sharafeldin, M.; Kerns, P.; Jin, L.; Dongare, A. M.; Rusling, J.; Suib, S. L. Partial Surface Selenization of Cobalt Sulfide Microspheres for Enhancing the Hydrogen Evolution Reaction. *ACS Catal.* **2019**, 9 (1), 456–465. <https://doi.org/10.1021/acscatal.8b02904>.
- (18) Tripathy, R. K.; Samantara, A. K.; Mane, P.; Chakraborty, B.; Behera, J. N. Cobalt Metal Organic Framework (Co-MOF) Derived CoSe<sub>2</sub>/C Hybrid Nanostructures for the Electrochemical Hydrogen Evolution Reaction Supported by DFT Studies. *New J. Chem.* **2022**, 46 (6), 2730–2738. <https://doi.org/10.1039/D1NJ05528C>.
- (19) Sahu, N.; Das, J. K.; Behera, J. N. Metal–Organic Framework (MOF) Derived Flower-Shaped CoSe<sub>2</sub> Nanoplates as a Superior Bifunctional Electrocatalyst for Both Oxygen and Hydrogen Evolution Reactions. *Sustain. Energy Fuels* **2021**, 5 (19), 4992–5000. <https://doi.org/10.1039/D1SE01112J>.
